# Supplementary material for: Circulating Platelet-Derived Extracellular Vesicles Are a Hallmark of Sars-Cov-2 Infection
Source: PubMed Central journal article supplement (PMC7825711; doi:10.3390/cells10010085), 2021-01-07
Supplement: cells-10-00085-s001.pdf [file cells-10-00085-s001.pdf]

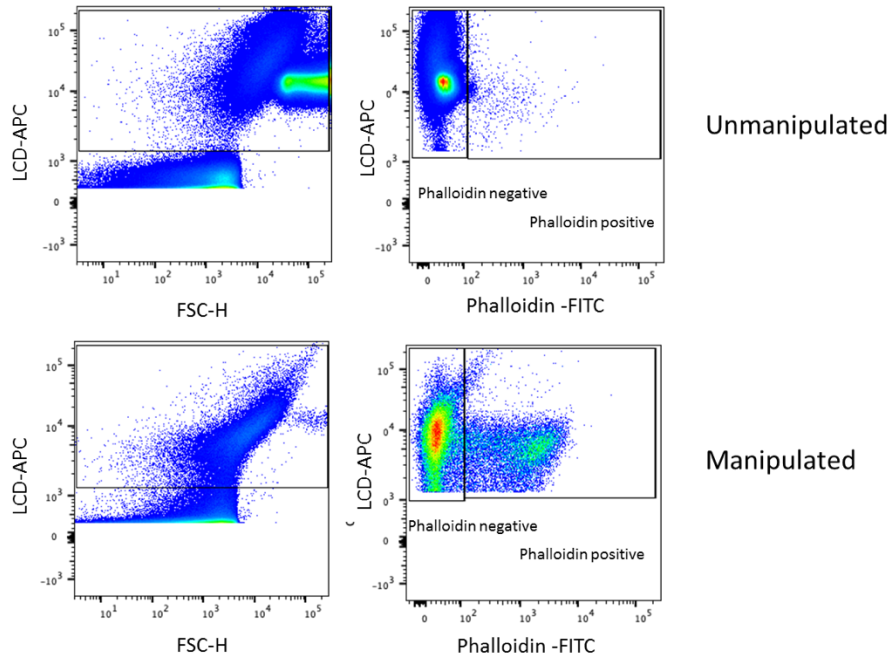

**Supplementary Figure 1.** Gating strategies showing the increase of phalloidin positive events resembling the presence of damaged PLT or, possibly, apoptotic bodies in manipulated blood sample.
